# Supplementary material
Source: HighWire-hosted journal article supplement (https://jech.bmj.com/content/73/2/130)

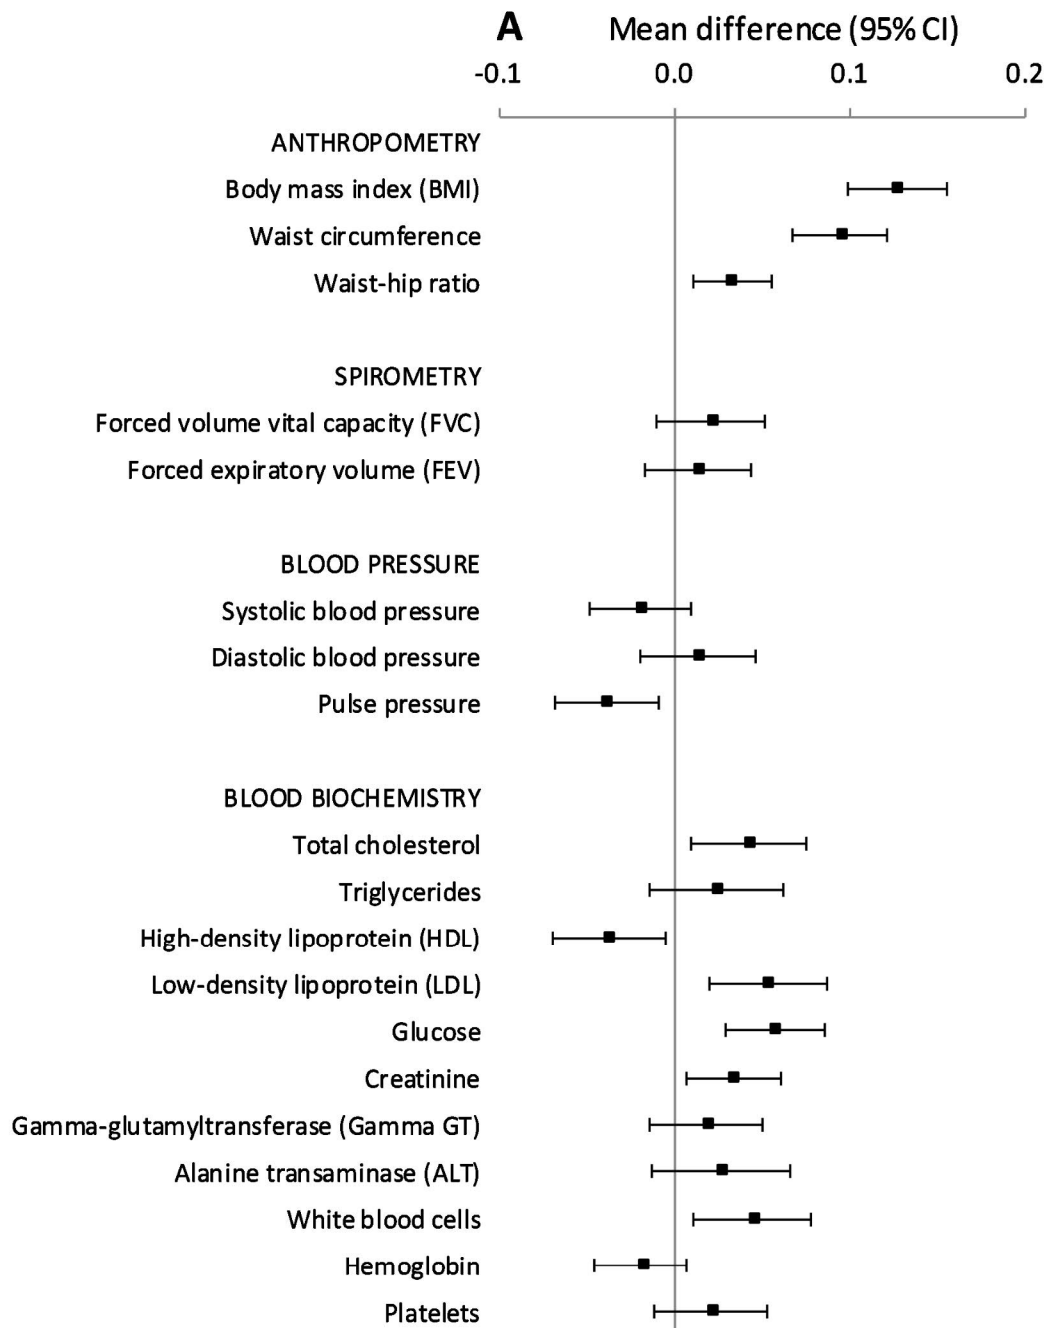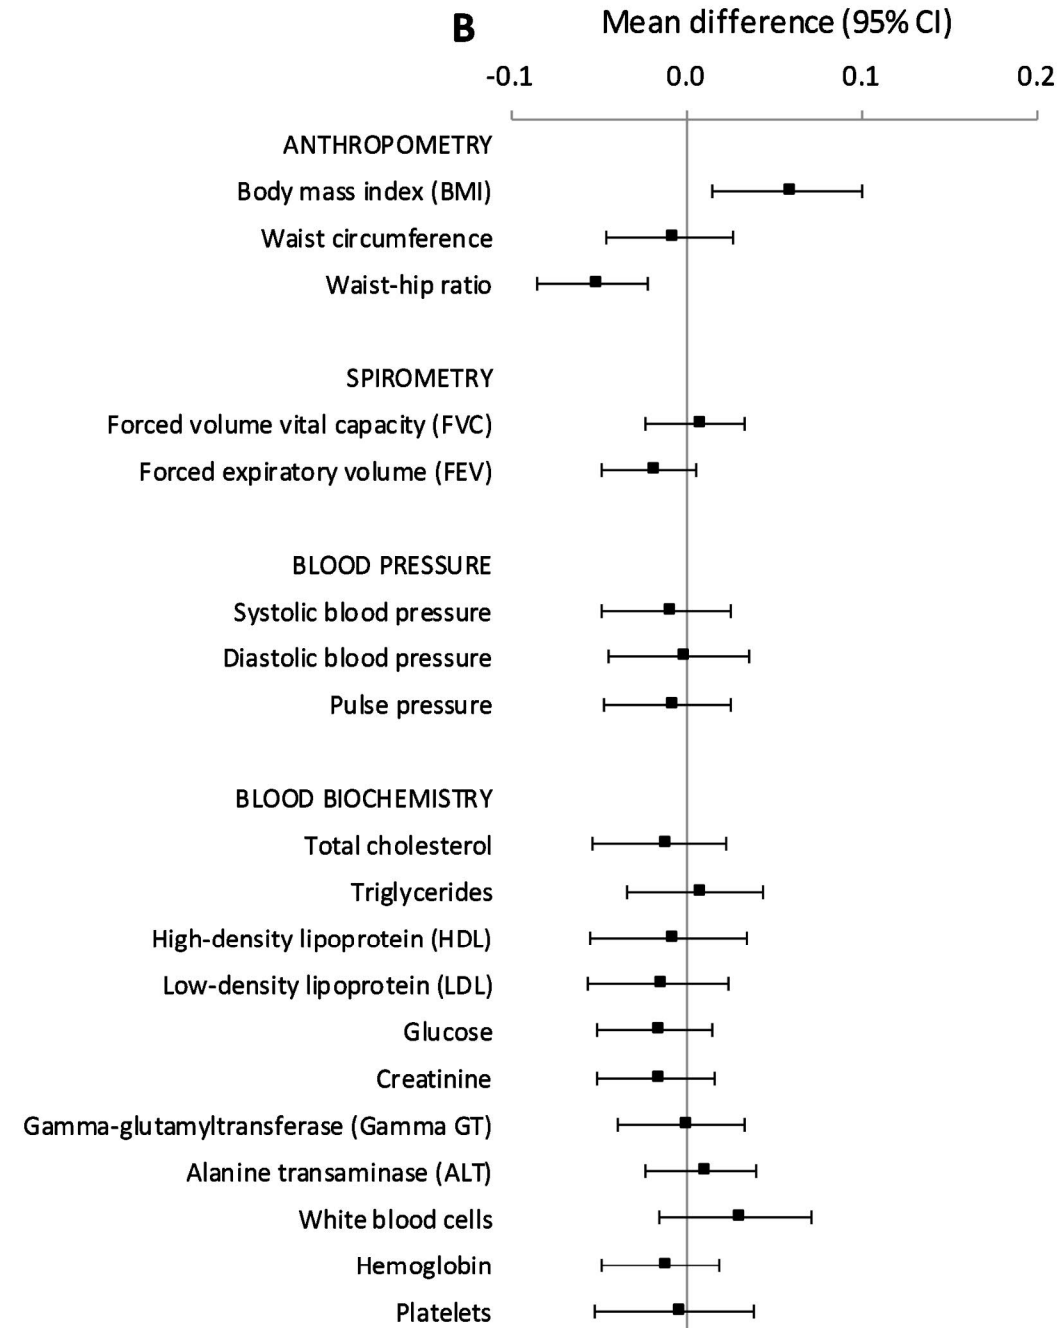

Supplement: inline-supplementary-material-4 [file inline-supplementary-material-4.pdf]

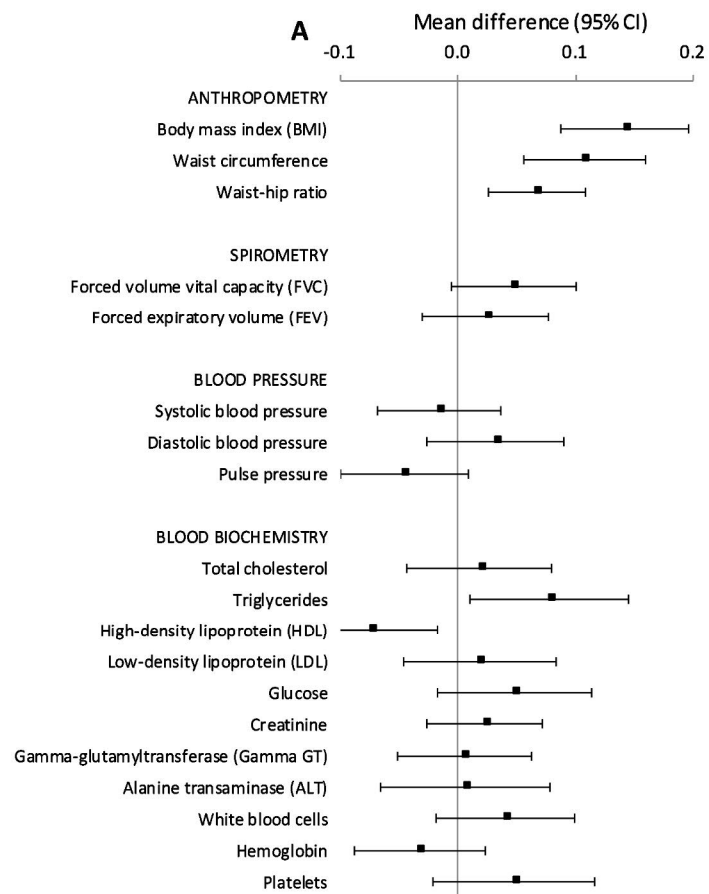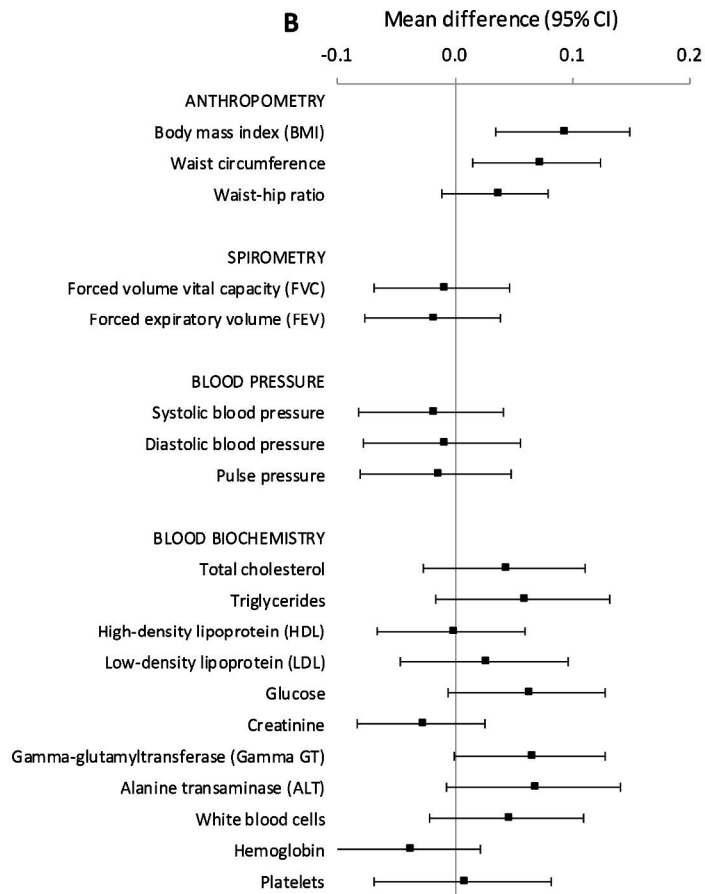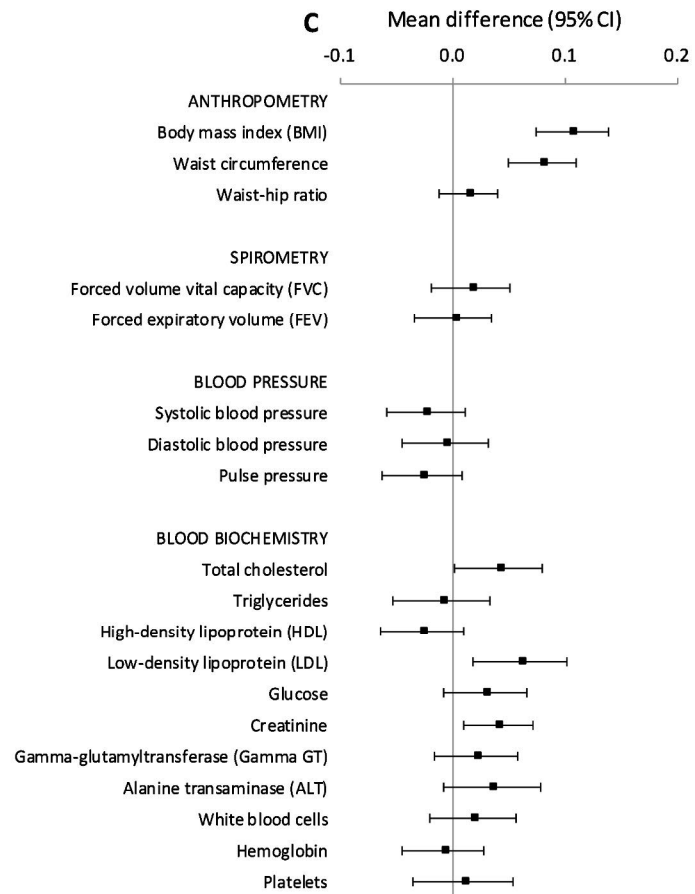

Supplement: inline-supplementary-material-5 [file inline-supplementary-material-5.pdf]
